# Supplementary material
Source: publisher figshare collection journal article supplement (https://sage.figshare.com/ndownloader/files/16356803)
Supplement: Supplementary file 1 [file 16356803]

## Appendix 1.

Please tick responses and provide brief answers in the areas indicated.

### 1. Do you use thoracic ultrasound imaging in clinical practice?

|     |  |
|-----|--|
| Yes |  |
| No  |  |

If **yes**, briefly state the role thoracic ultrasound imaging has in your clinical practice.

---

---

---

If **no**, what role(s) do you anticipate that thoracic ultrasound could have in your clinical practice?

---

---

---

### 2. Have you undertaken any training in thoracic ultrasound imaging?

|     |  |
|-----|--|
| Yes |  |
| No  |  |

If **yes**, state the method and duration of the training:

---

---

---

If **no**, what methods and format of any future training would you prefer?

---

---

---

### 3. Have any factors influenced your ability to use thoracic ultrasound imaging in clinical practice?

Please state these factors whether positive or negative:

---

---

---

---
